# Supplementary material for: Marking Embryonic Stem Cells with a 2A Self-Cleaving Peptide: A NKX2-5 Emerald GFP BAC Reporter
Source: PubMed Central journal article supplement (PMC2430532; doi:10.1371/journal.pone.0002532), 2008-07-02

Figure S1A

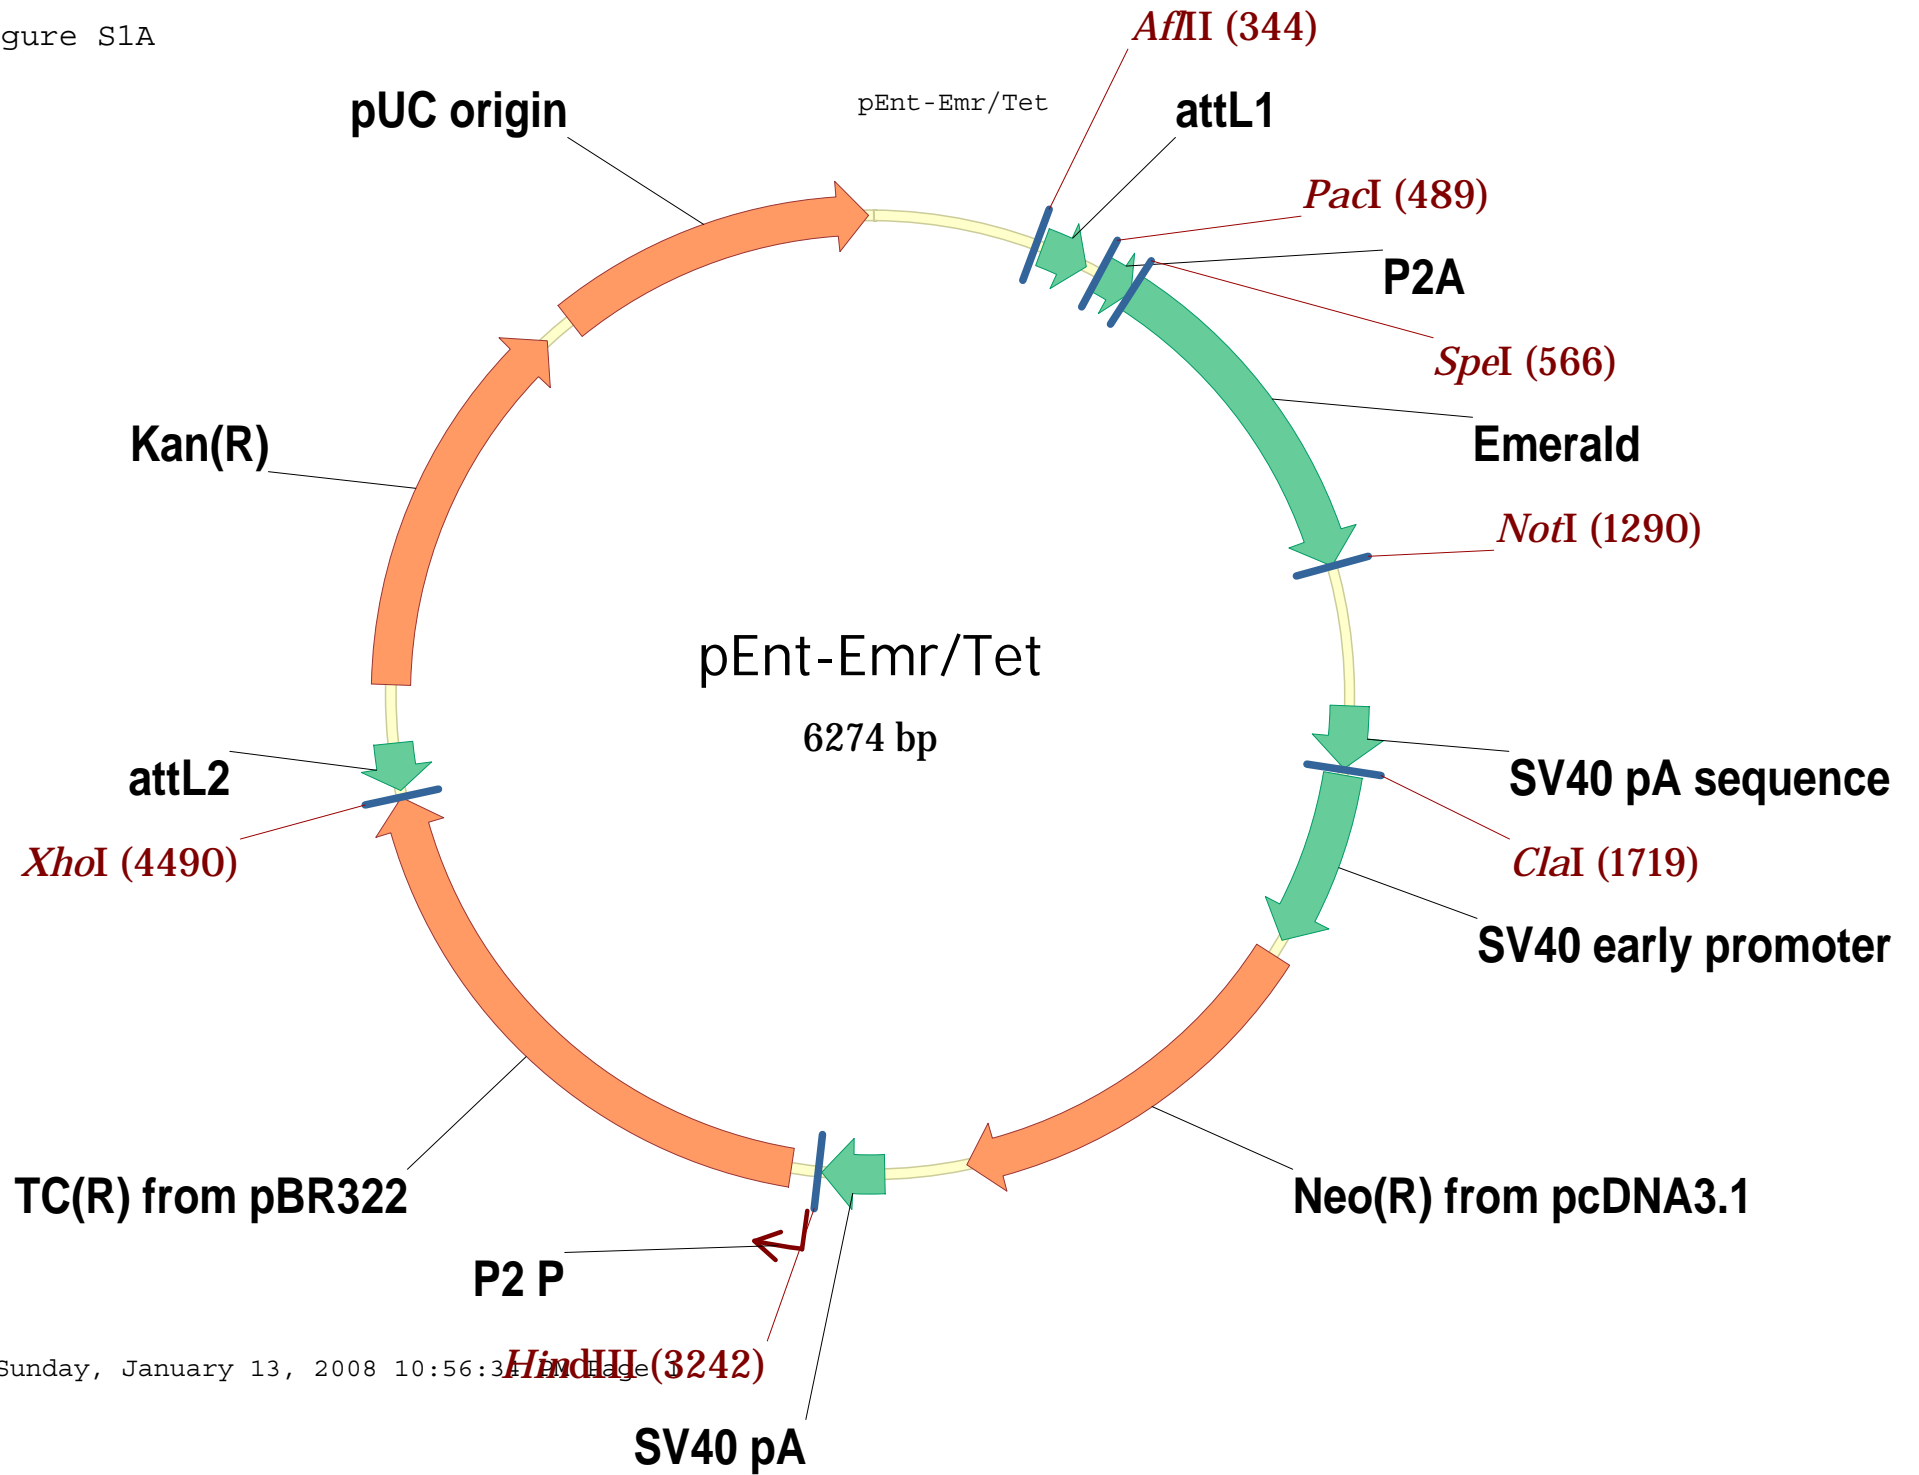

Figure S1B

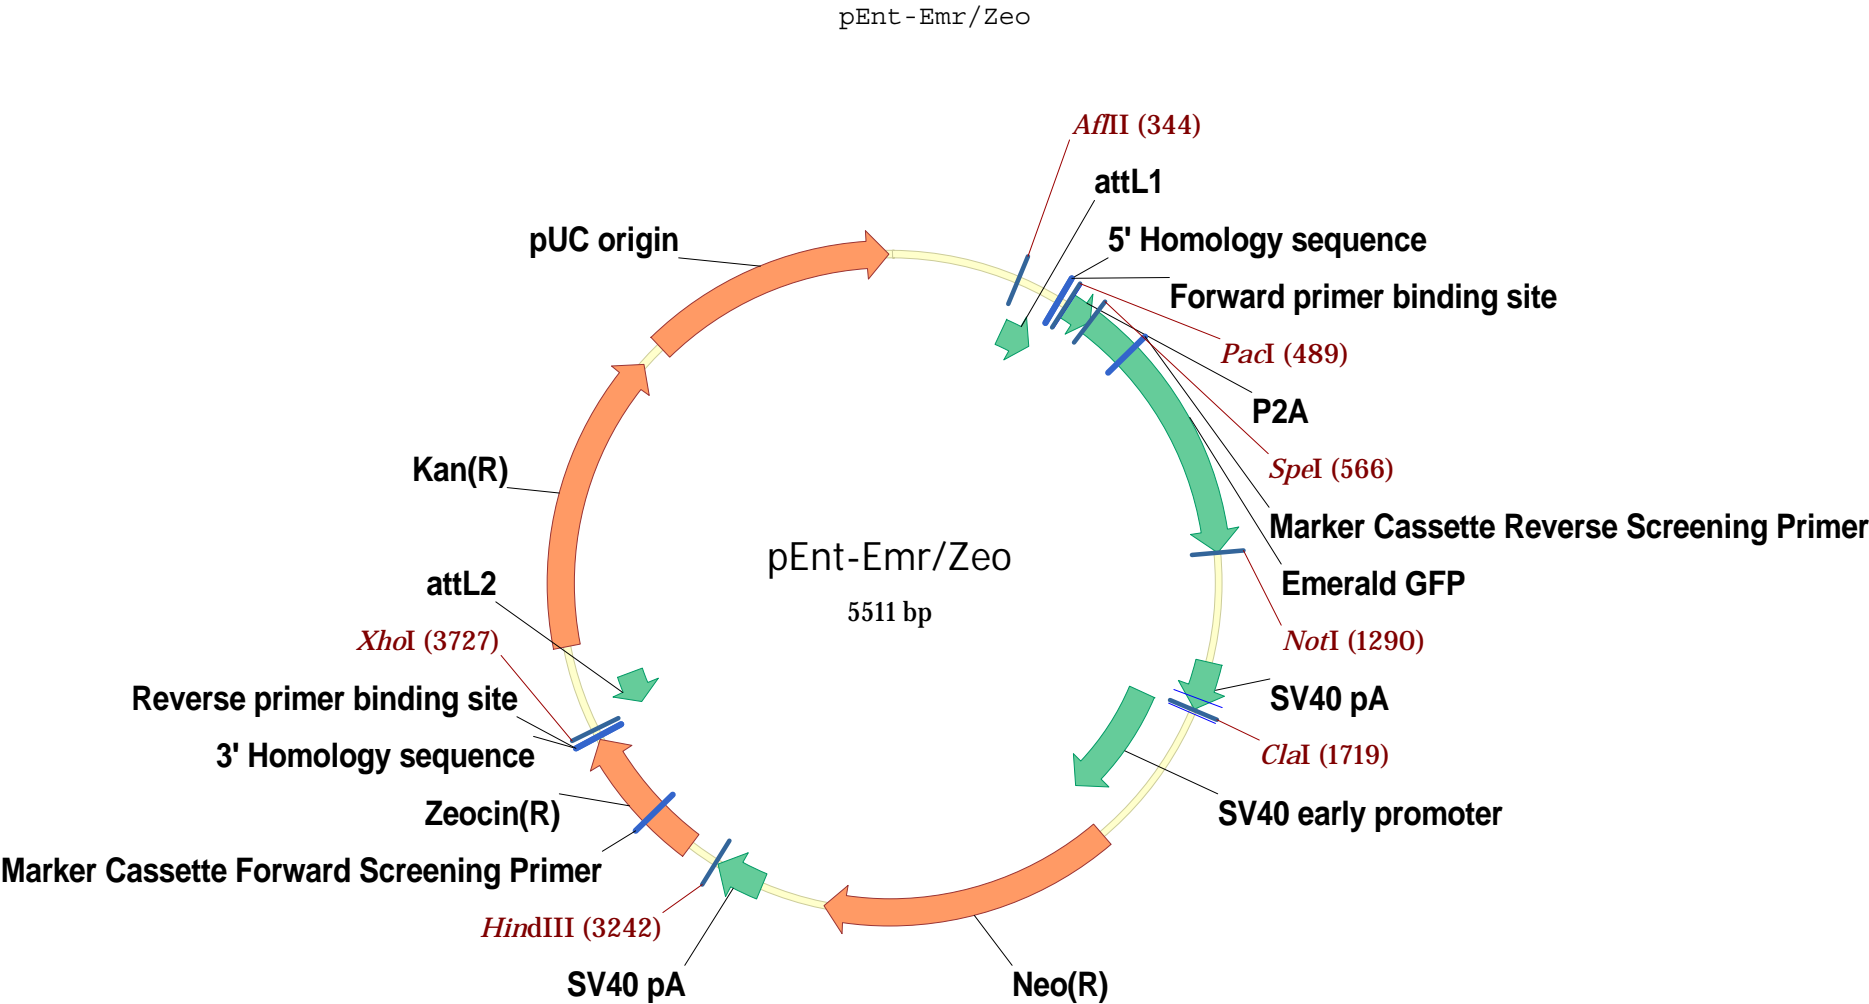

Figure S1C

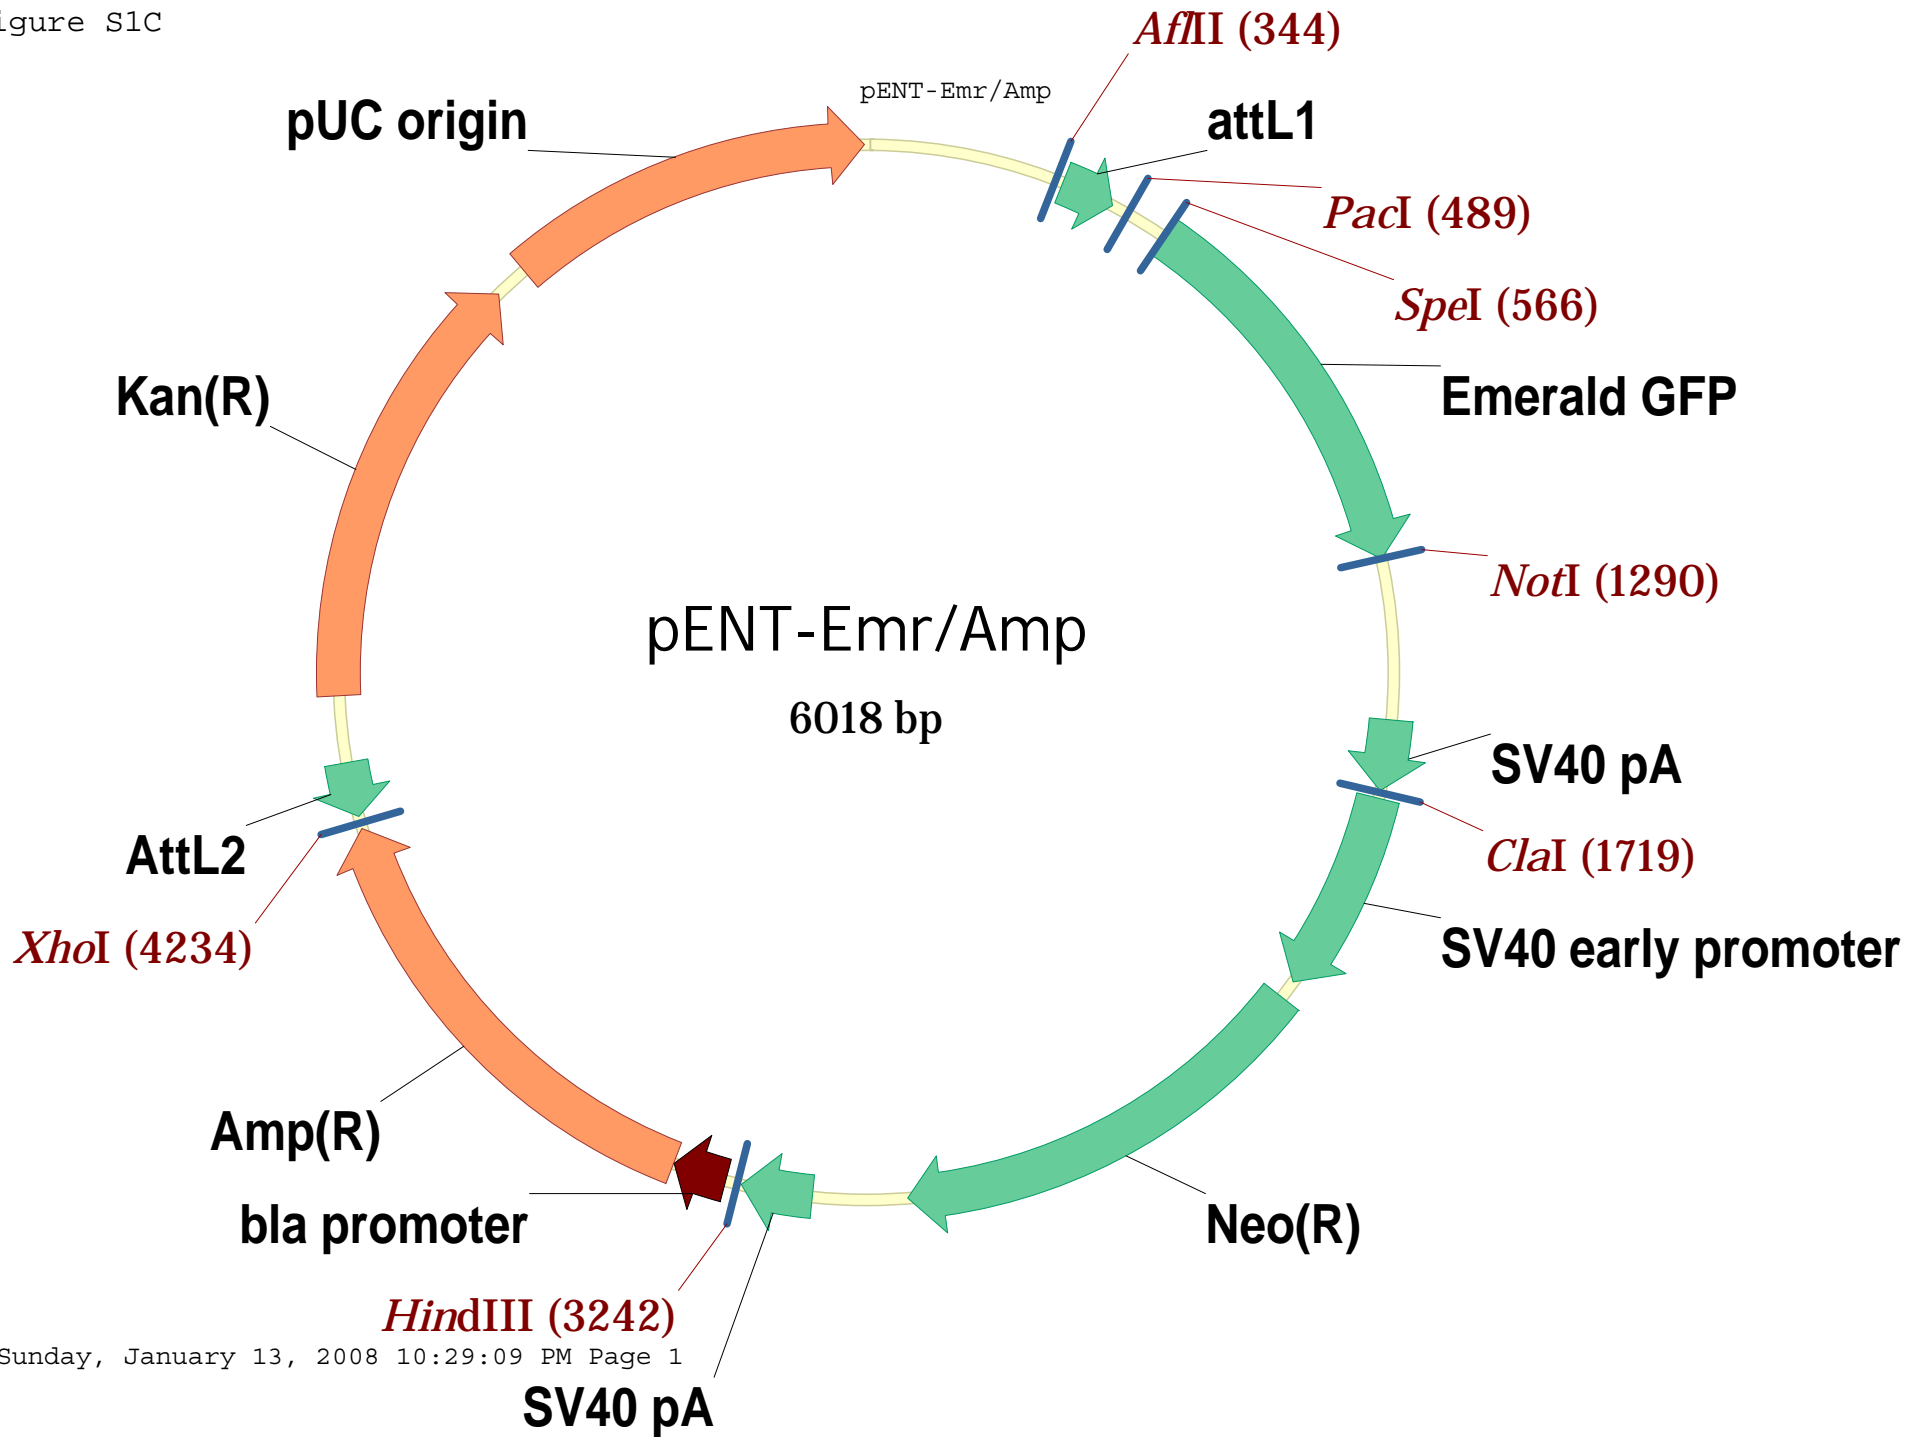

Figure S1D

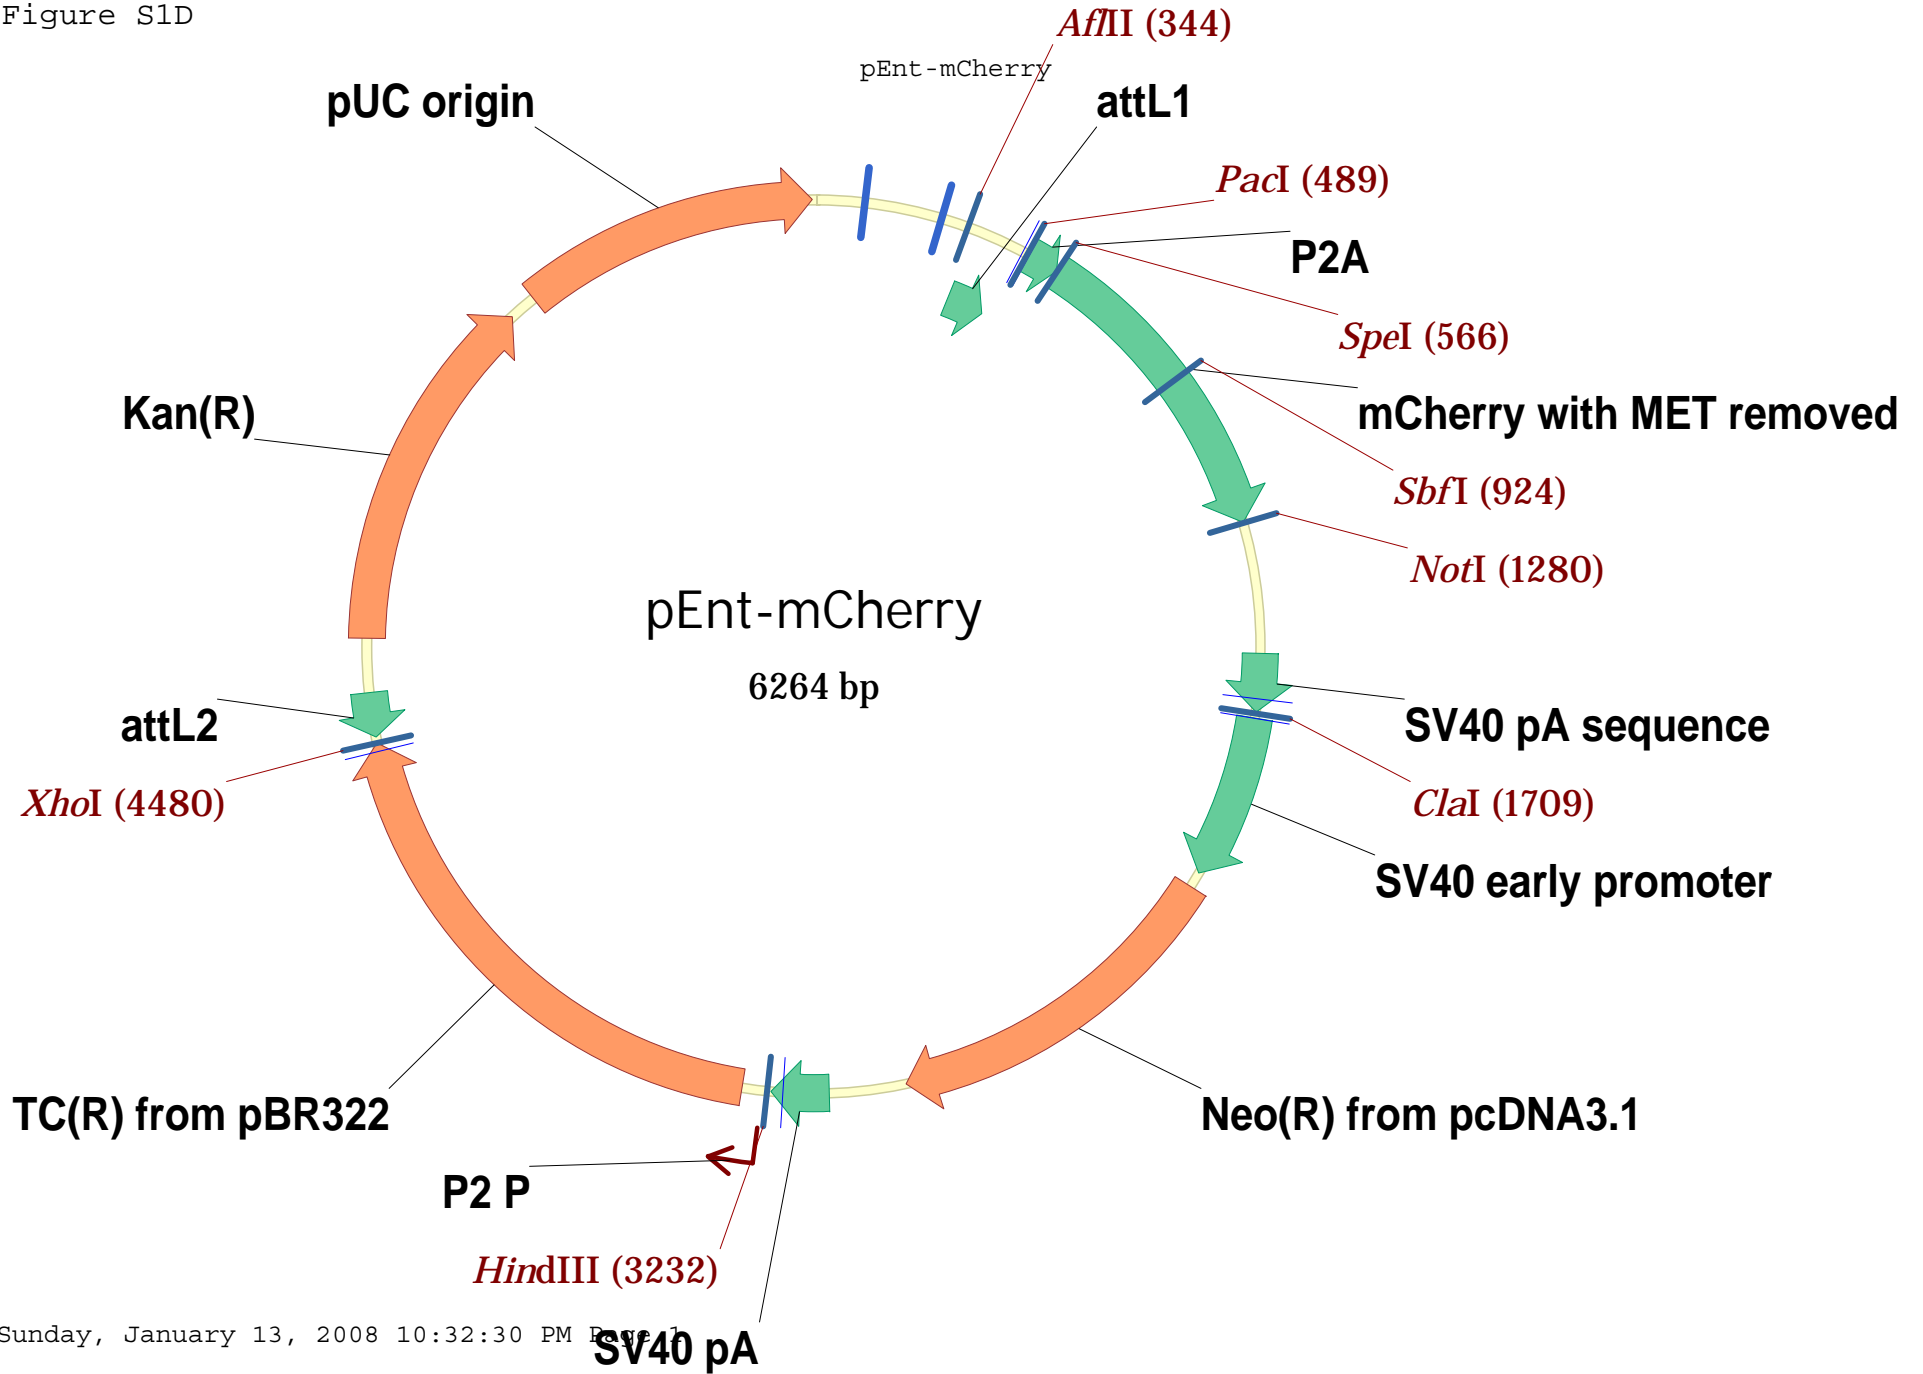

Figure S1E

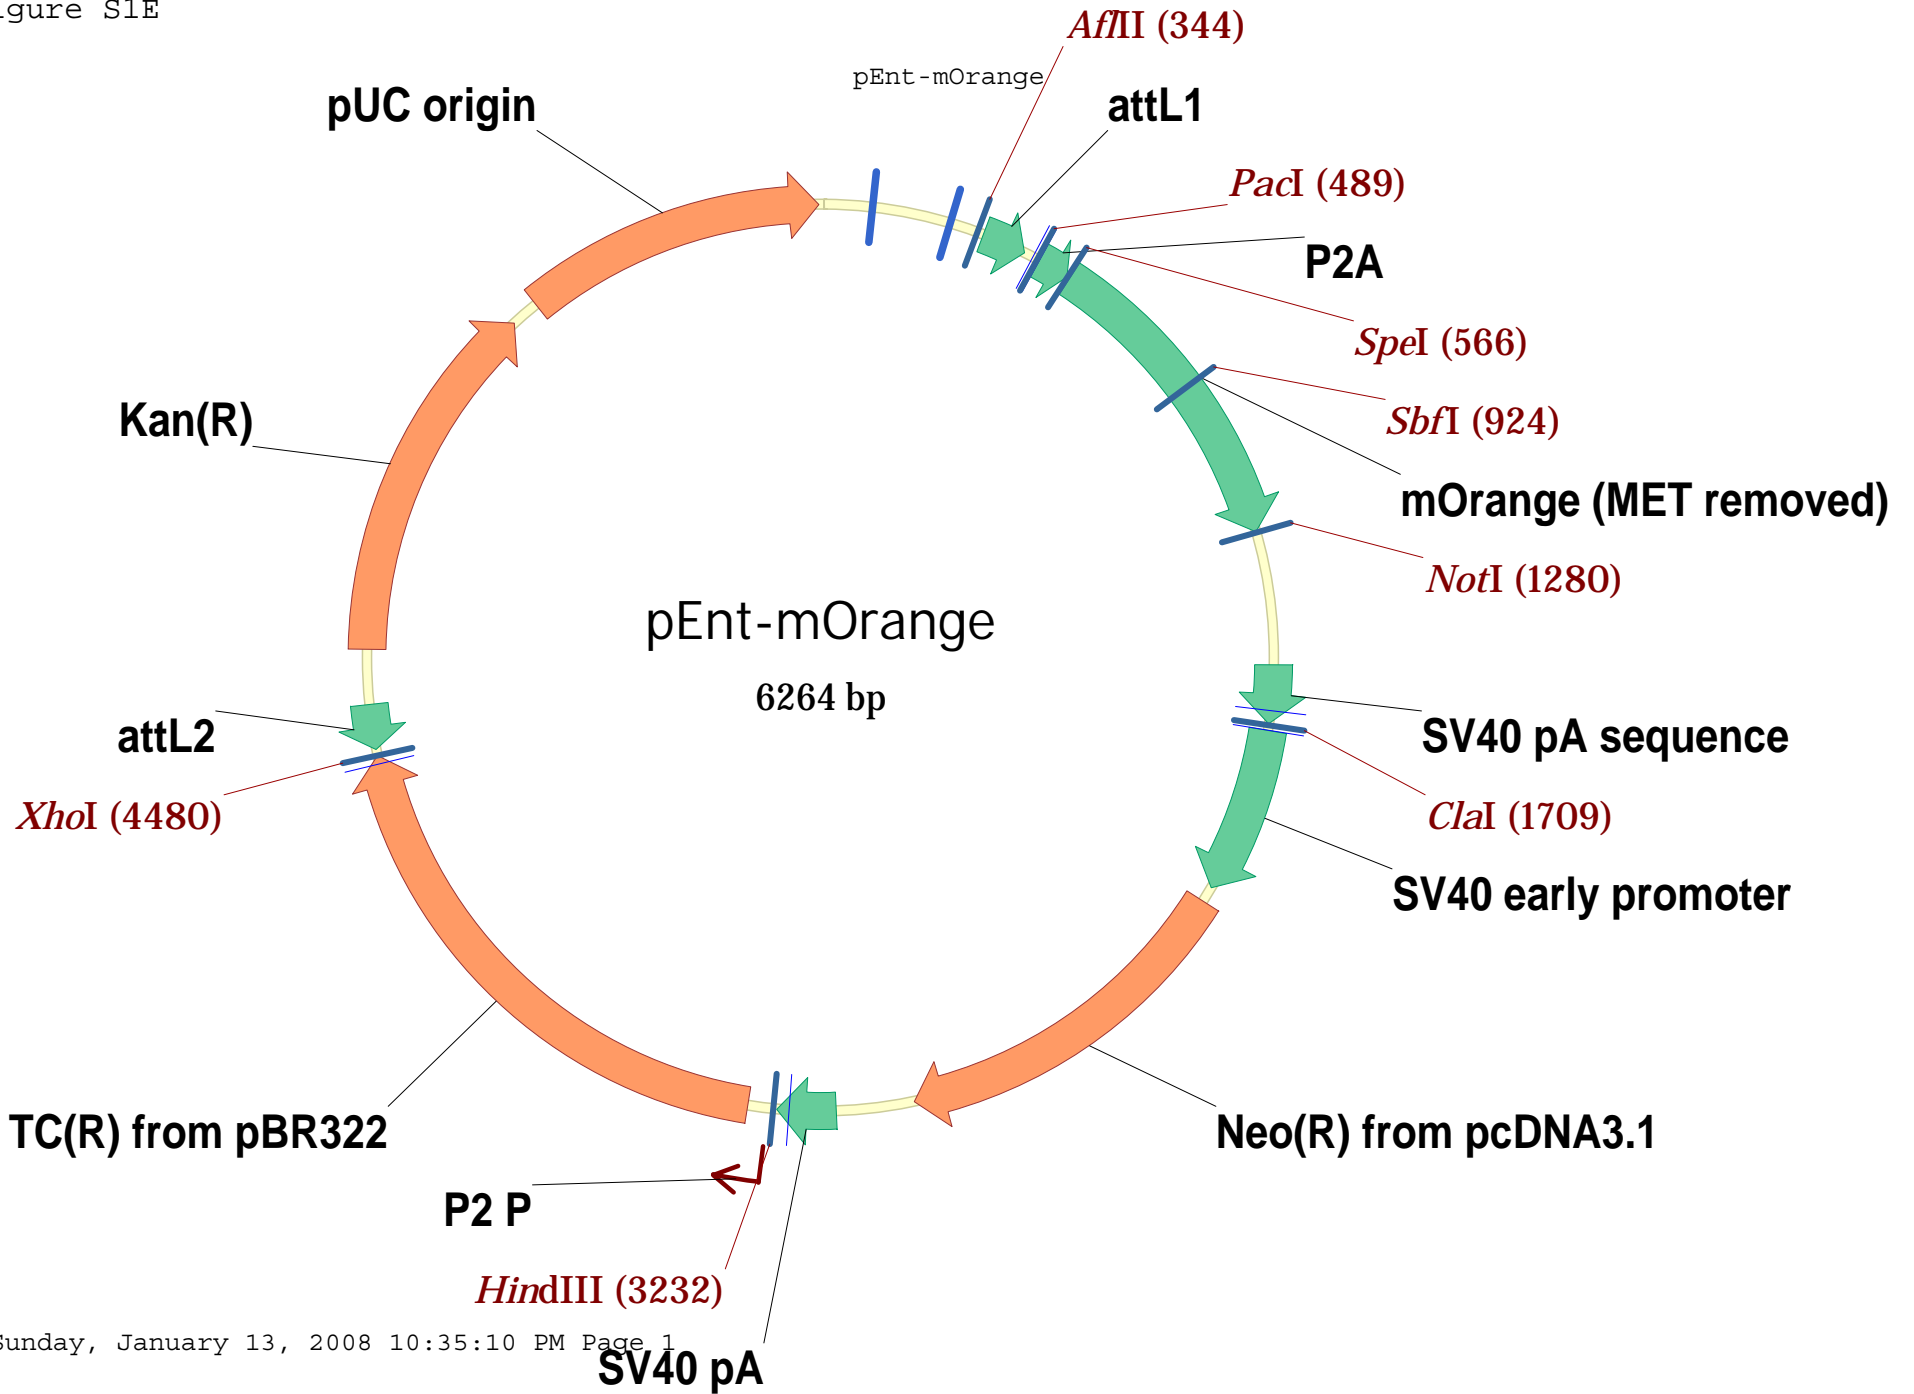

Figure S1F

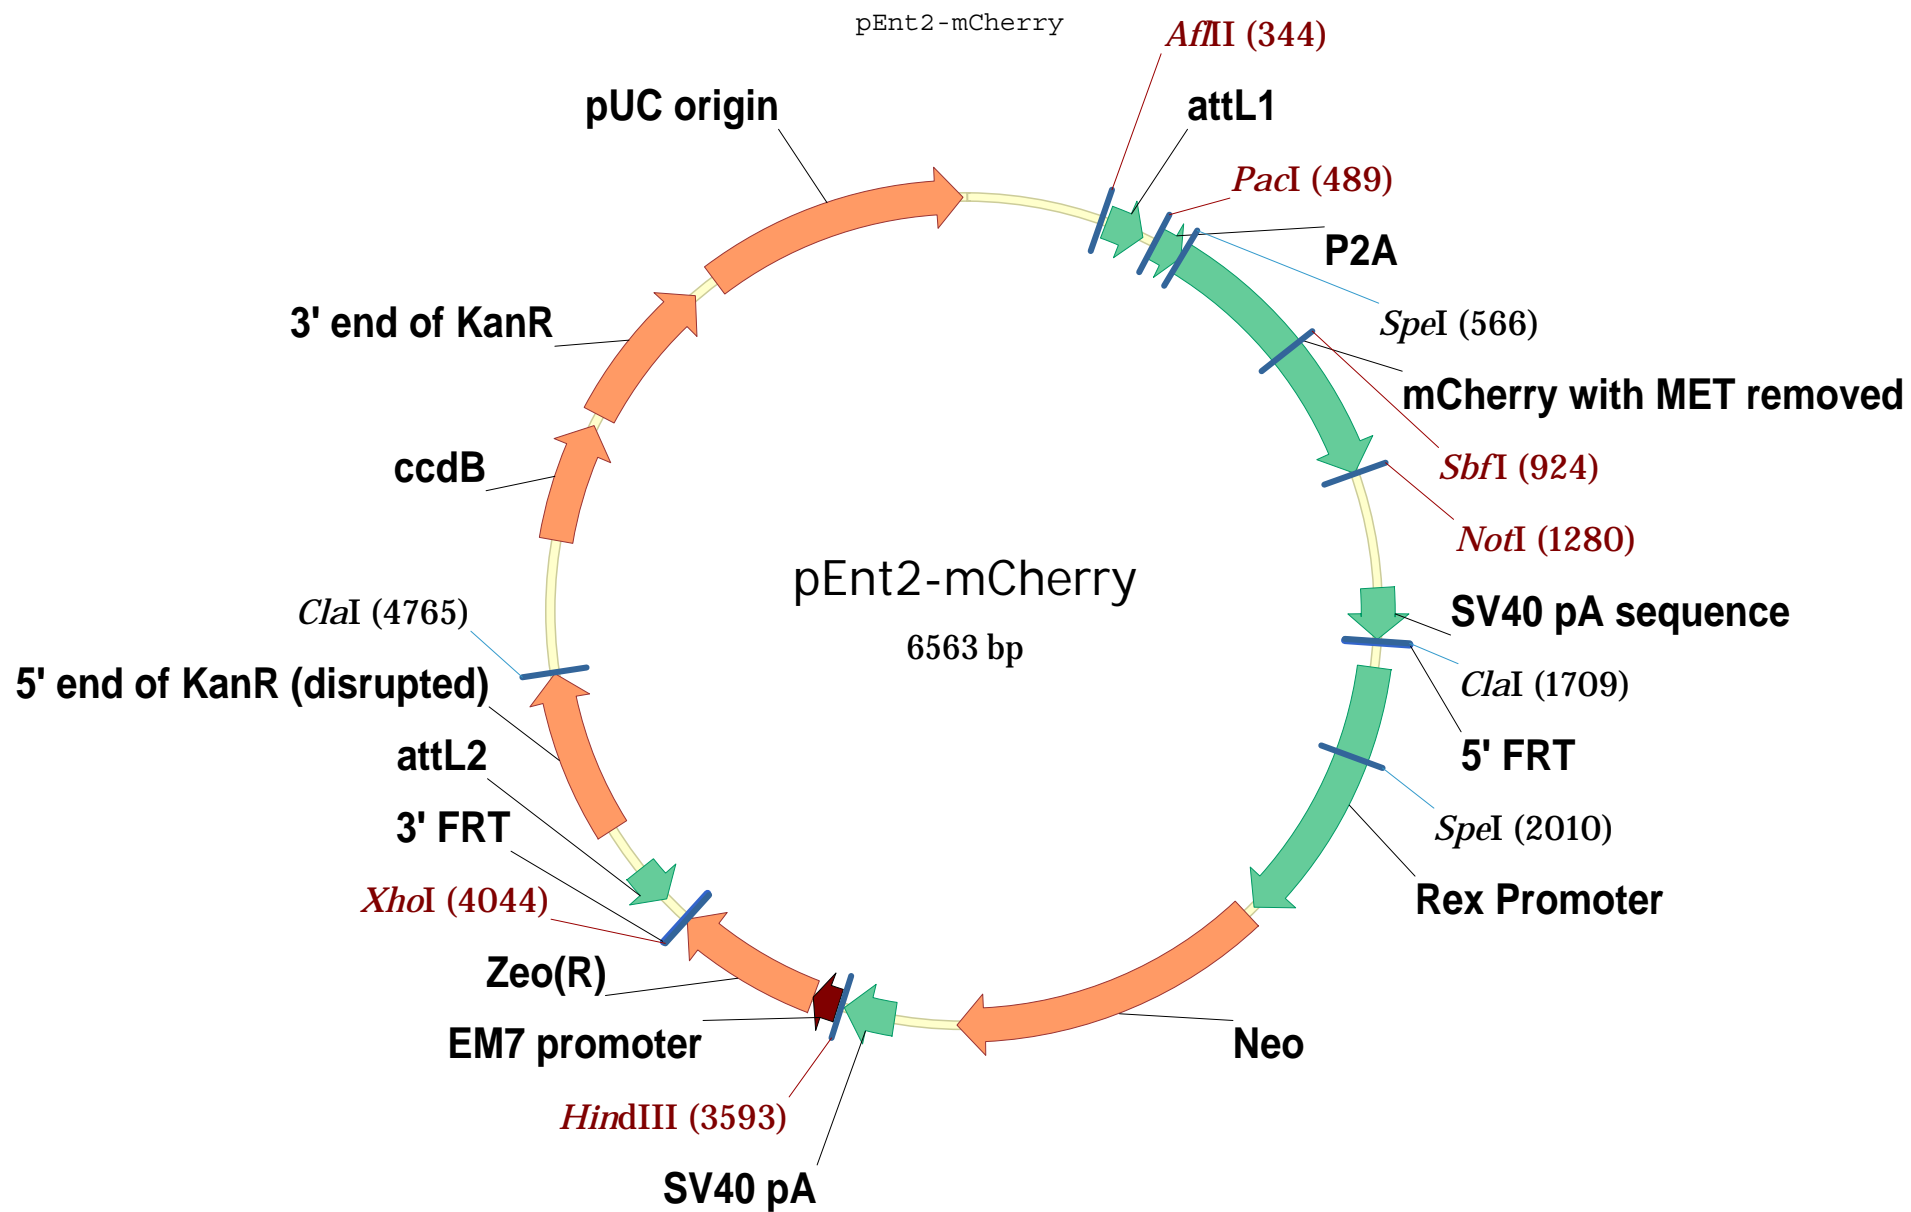

Supplement: pone.0002532.s001.pdf [file pone.0002532.s001.pdf]
