# Supplementary material for: Marking Embryonic Stem Cells with a 2A Self-Cleaving Peptide: A NKX2-5 Emerald GFP BAC Reporter
Source: PubMed Central journal article supplement (PMC2430532; doi:10.1371/journal.pone.0002532), 2008-07-02

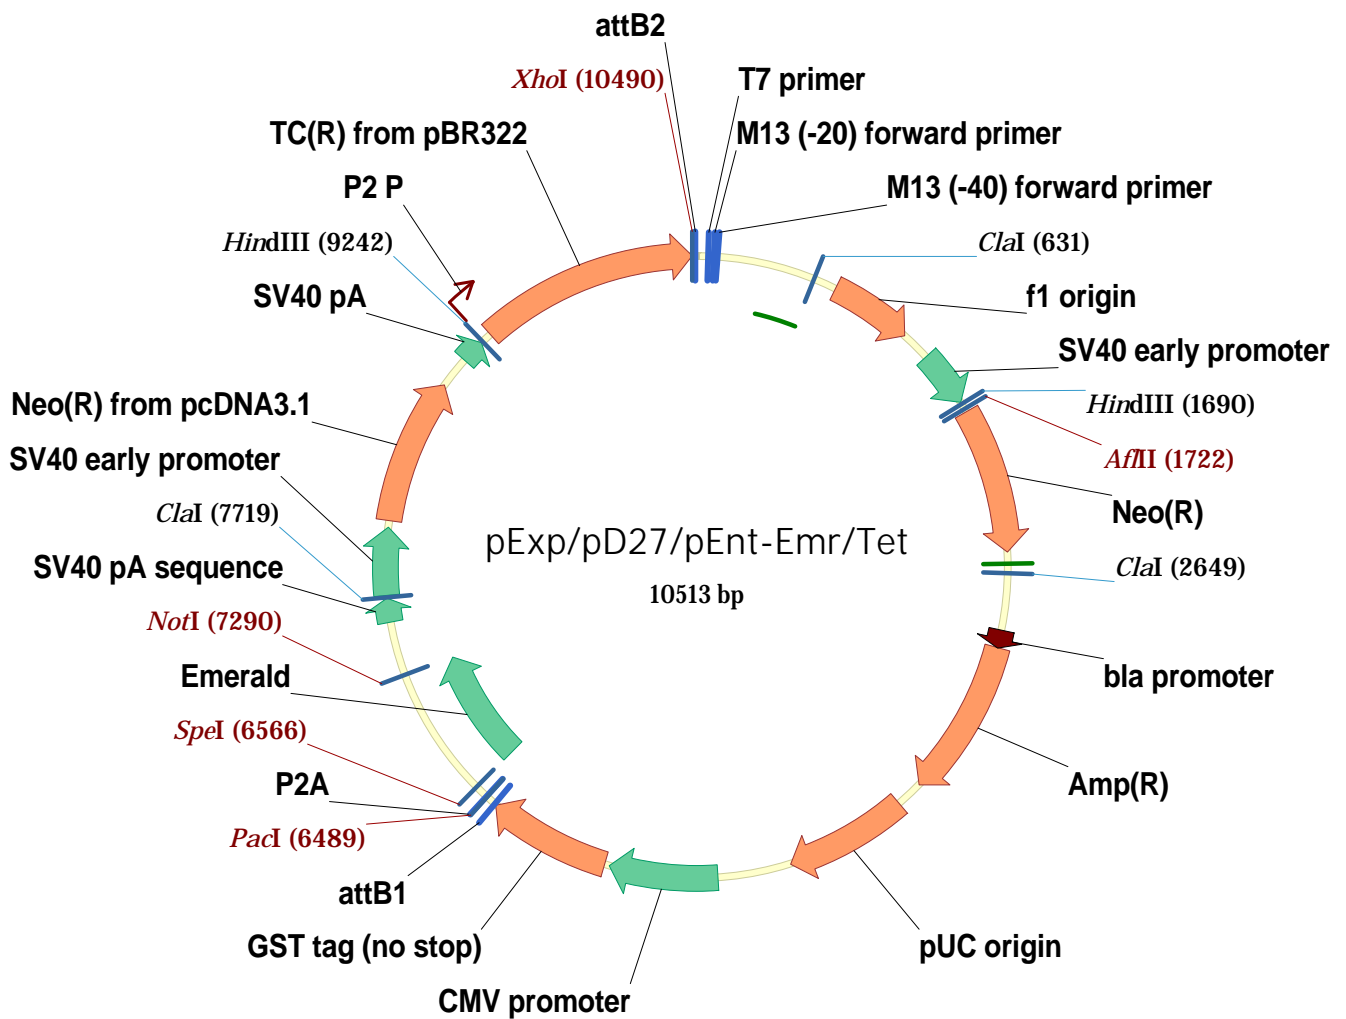

Supplement: pone.0002532.s002.pdf [file pone.0002532.s002.pdf]
