# Supplementary material for: Marking Embryonic Stem Cells with a 2A Self-Cleaving Peptide: A NKX2-5 Emerald GFP BAC Reporter
Source: PubMed Central journal article supplement (PMC2430532; doi:10.1371/journal.pone.0002532), 2008-07-02
Supplement: pone.0002532.s003.pdf [file pone.0002532.s003.pdf]

# A

BNIP1 (chr5: 172,504,146-172,523,950)

NKX2-5 (chr5: 172,591,744-172,594,868)

RP11-88L12 (chr5: 172,467,260-172,659,285)

# B

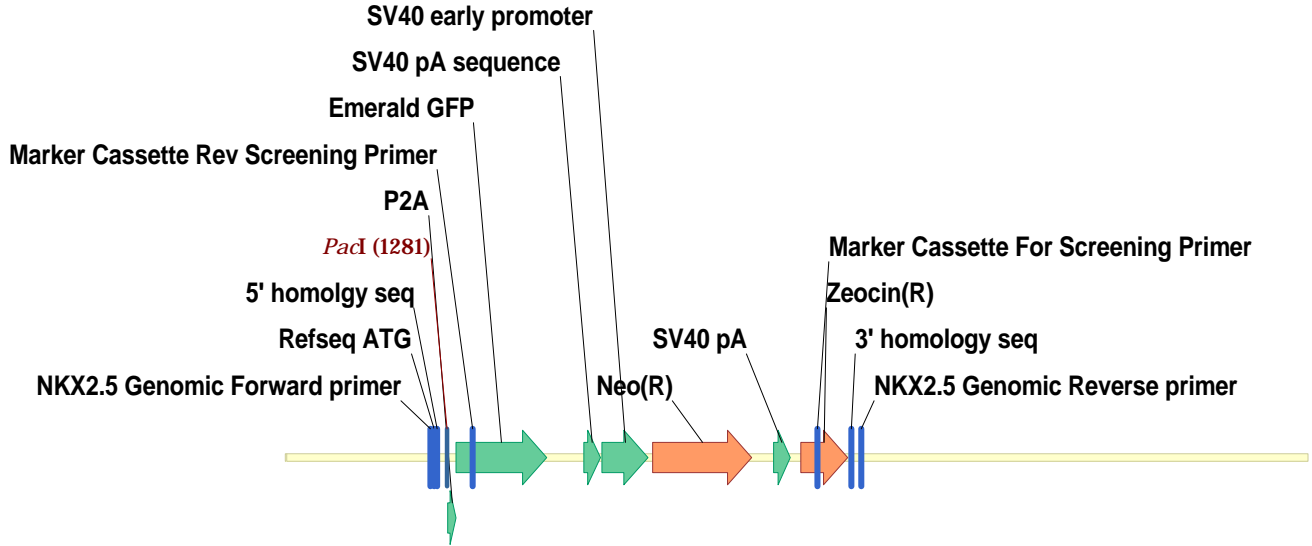

RP11-88L12 NKX2-5 EmGFP map

8168 bp

# C

|      |                                                                                                                                                                                                                                  |
|------|----------------------------------------------------------------------------------------------------------------------------------------------------------------------------------------------------------------------------------|
| 1001 | GCCTGGTCCC GCCTCTCTCTG CCCCTTGTGC TCAGCGCTAC CTGCTGCCCG GACACATCCA GAGCTGGCCG ACGGGTGC GC GGCGGGCGG CGGCACCATG<br>CGGACCAGGG CCGAGAGGAC GGGGAACACG AGTCGCGATG GACGACGGGC CTGTGTAGGT CTCGACCAGGC TGCCACAGCG CCCGCCCGCC GCCGTGGTAC |
|      | <b>NKX2.5 Genomic Forward primer</b> <span style="float: right;"><b>Refseq ATG</b></span>                                                                                                                                        |
| -1   | Met Phe Pro Ser Pro Ala Leu Thr                                                                                                                                                                                                  |
| 1101 | CAGGGAAGCT GCCAGGGGCC GTGGGCAGCG CCGCTTCTGT CCGCCACCT GGCCTGTGA GACTGGCGCT GCCACCATGT TCCCCAGCCC TGCTCTCAG<br>GTCCCTTCGA CGGTCCCCGG CACCCGTCGC GCGAAAAGC GCGGGTGGG CCGCGACACT CTGACCAGCGA CGGTGGTACA AGGGGTCGGG ACGAGAGTGC       |
|      | <b>5' homology seq</b> <span style="float: right;"><b>PacI</b></span> <span style="float: right;"><b>P2A</b></span>                                                                                                              |
| -1   | Pro Thr Pro Phe Ser Val Lys Asp Ile Leu Asn Leu Glu Gln Gln Gln Arg Ser Leu Asn Gln Phe Ser Arg Gln Leu Ile Asn Val Glu Gly Ser Gly Ala                                                                                          |
| 1201 | CCCACGCCCT TCTCAGTCAA AGACATCCTA AACCTGGAAC AGCAGCAGCG CAGCCTGAAC CAATTCAGTC GACAATTAAT TAACGTCGAG GGCAGCGGCG<br>GGGTGCGGGA AGAGTCAGTT TCTGTAGGAT TTGGACCTTG TCGTCGTCCG GTCGGACTTG GTTAAATTA ATTGCAGCTC CCGTCGCCCG               |
|      | <b>P2A</b> <span style="float: right;"><b>Emerald GFP</b></span>                                                                                                                                                                 |
| -1   | Ala Thr Asn Phe Ser Leu Leu Lys Gln Ala Gly Asp Val Glu Glu Asn Pro Gly Pro Thr Ser Met Val Ser Lys Gly Glu Glu Leu Phe Thr Gly Val Val                                                                                          |
| 1301 | CGACCAACTT TAGCCTGCTG AAACAGGCGG GCGATGTGGA AGAAAACCCA GGACCGACTA GTATGGTGAG CAAGGGCGAG GAGCTGTTCA CCGGGTGGT<br>GCTGTTGAA ATCGGACGAC TTTGTCCGCC CGTACACCT TCTTTGGGT CCTGGCTGAT CATACCACCT GTTCCCGCTC CTCGACAAGT GGCCCCACCA       |
|      | <b>Emerald GFP</b>                                                                                                                                                                                                               |
| -1   | Val Pro Ile Leu Val Glu Leu Asp Gly Asp Val Asn Gly His Lys Phe Ser Val Ser Gly Glu Gly Glu Gly Asp Ala Thr Tyr Gly Lys Leu Thr Leu Lys                                                                                          |
| 1401 | GCCCATCCTG GTCGAGCTGG ACGGCGACGT AAACGGCCAC AAGTTCAGCG TGTCCGGCGA GGGCGAGGGC GATGCCACCT ACGGCAAGCT GACCTGAAG<br>CGGGTAGGAC CAGCTCGACC TGCCGCTGCA TTTGCCGGTG TTCAAGTCGC ACAGGCCGCT CCCGCTCCG CTACGGTGGG TGCCGTTTCA CTGGGACTTC     |
|      | <b>Emerald GFP</b> <span style="float: right;"><b>Marker Cassette Rev Screening Primer</b></span>                                                                                                                                |
| -1   | Phe Ile Cys Thr Thr Gly Lys Leu Pro Val Pro Trp Pro Thr Leu Val Thr Thr Leu Thr Tyr Gly Val Gln Cys Phe Ala Arg Tyr Pro Asp His Met Lys                                                                                          |
| 1501 | TTCATCTGCA CCACCGGCAA GCTGCCCGTG CCTGGGCCA CCCTCGTGAC CACCTTGACC TACGGCGTGC AGTGCTTCGC CCGCTACCCC GACCACATGA<br>AAGTAGACGT GGTGGCCGTT CGACGGGCAC GGGACCGGGT GGGAGCACTG GTGGAAGTGG ATGCCGCACG TCACGAAAGC GCGGATGGGG CTGGTGTACT    |
|      | <b>Marker Cassette Rev Screening Primer</b>                                                                                                                                                                                      |
